# Supplementary material for: Spontaneous water release inducing nucleation during the nonaqueous synthesis of TiO2 nanoparticles
Source: Royal Society of Chemistry journal article supplement (doi:10.1039/c2ce25934f), 2012-01-01
Supplement: c2ce25934f.pdf [file c2ce25934f.pdf]

# Spontaneous water release inducing nucleation during the nonaqueous synthesis of TiO<sub>2</sub> nanoparticles

Mandy Zimmermann<sup>a</sup> and Georg Garnweitner<sup>\*a</sup>

<sup>a</sup> Institute for Particle Technology, Technische Universität Braunschweig, Germany.

## Electronic Supplementary Information

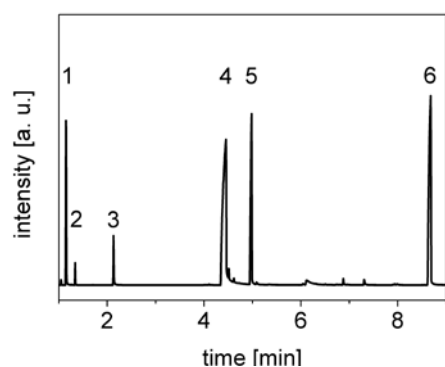

**Fig. 1** GC measurement of the reaction mixture after complete reaction; the peaks are assigned to the components as follows: **1** isopropyl alcohol, **2** diisopropyl ether, **3** toluene, **4** benzyl alcohol, **5** benzyl isopropyl ether, **6** dibenzyl ether.

The reaction mixture was diluted in dichloromethane (HPLC grade), and the measurement was performed with an Agilent 7820A GC.

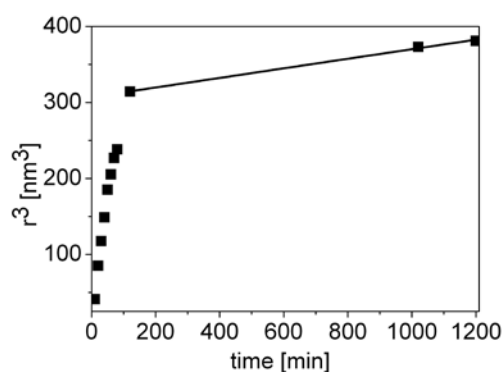

**Fig. 2** Crystal radius cubed over time related to the LSW theory. In the second stage of particle growth, the possibility of a linear fit suggests an Ostwald ripening process.
